# Supplementary material for: Fullerene C70/porphyrin hybrid nanoarchitectures: single-cocrystal nanoribbons with ambipolar charge transport properties
Source: Royal Society of Chemistry journal article supplement (doi:10.1039/d2ra02669d), 2022-01-01
Supplement: d2ra02669d1.pdf [file d2ra02669d1.pdf]

## Supporting Information

### Fullerene C<sub>70</sub>/Porphyrin Hybrid Nanoarchitectures: Single-Cocrystal Nanoribbons with Ambipolar Charge Transport Properties

Takatsugu Wakahara,<sup>\*a</sup> Kahori Nagaoka,<sup>a</sup> Chika Hirata,<sup>a</sup> Kun'ichi Miyazawa,<sup>b</sup> Kazuko Fujii,<sup>a</sup> Yoshitaka Matsushita,<sup>c</sup> Osamu Ito,<sup>a</sup> Makito Takagi,<sup>d</sup> Tomomi Shimazaki,<sup>d</sup> Masanori Tachikawa,<sup>\*d</sup> Yoshiki Wada,<sup>a</sup> Shinjiro Yagyu,<sup>a</sup> Yubin Liu,<sup>e</sup> Yoshiyuki Nakajima,<sup>e</sup> and Kazuhito Tsukagoshi<sup>\*f</sup>

<sup>a</sup> *Research Center for Functional Materials, National Institute for Materials Science  
1-1 Namiki, Tsukuba, Ibaraki 305-0044, Japan.*

*E-mail: Wakahara.Takatsugu@nims.go.jp*

<sup>b</sup> *Department of Chemical Sciences and Technology, Graduate School of Chemical Sciences and  
Technology, Tokyo University of Science, 12-1-203, Ichigaya Funakawara-machi, Shinjuku-ku,  
Tokyo 162-0826, Japan*

<sup>c</sup> *Research Network and Facility Services Division, National Institute for Materials Science, 1-2-1  
Sengen, Tsukuba, Ibaraki 305-0047, Japan*

<sup>d</sup> *Quantum Chemistry Division, Graduate School of NanoBioScience, Yokohama City University,  
22-2 Seto, Kanazawa-ku, Yokohama, Kanagawa 236-0027, Japan*

*E-mail: tachi@yokohama-cu.ac.jp*

<sup>e</sup> *RIKEN KEIKI Co.,Ltd., 2-7-6, Azusawa, Itabashi-ku, Tokyo, 174-8744, JAPAN*

<sup>f</sup> *International Center for Materials Nanoarchitectonics (WPI-MANA), National Institute for  
Materials Science, 1-1 Namiki, Tsukuba, Ibaraki 305-0044, Japan*

*E-mail: Tsukagoshi.Kazuhito@nims.go.jp*

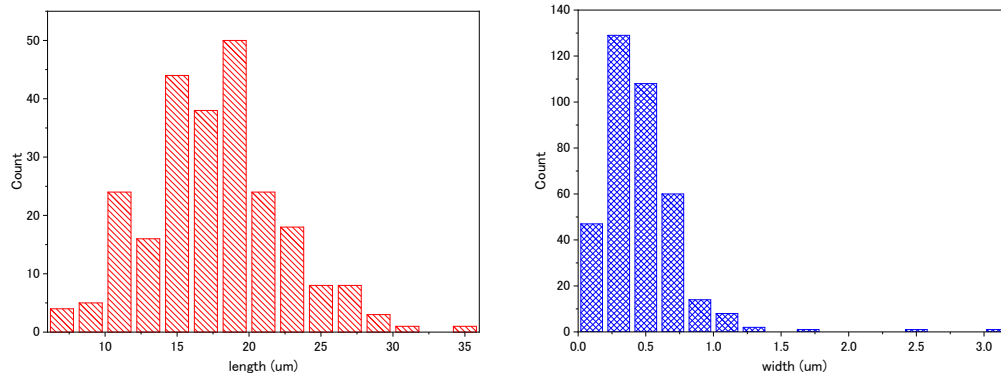

**Figure S1. The size distribution histograms of C<sub>70</sub>/3,5-TPP nanoribbons.**

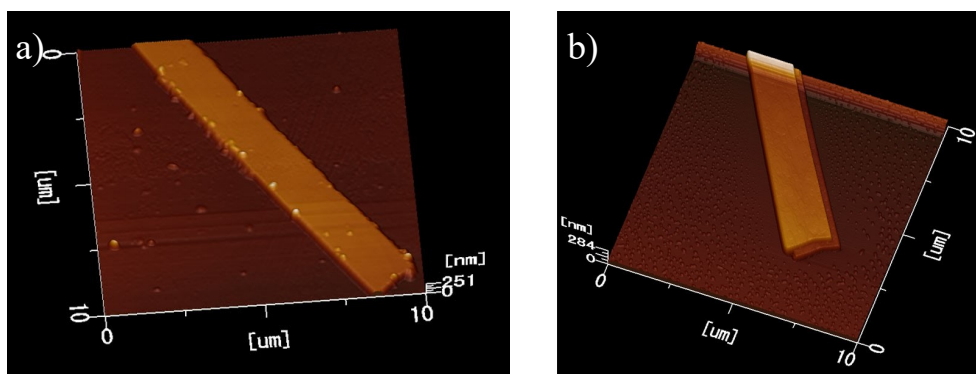

Figure S2. The AFM images of C<sub>70</sub>/3,5-TPP nanoribbons.

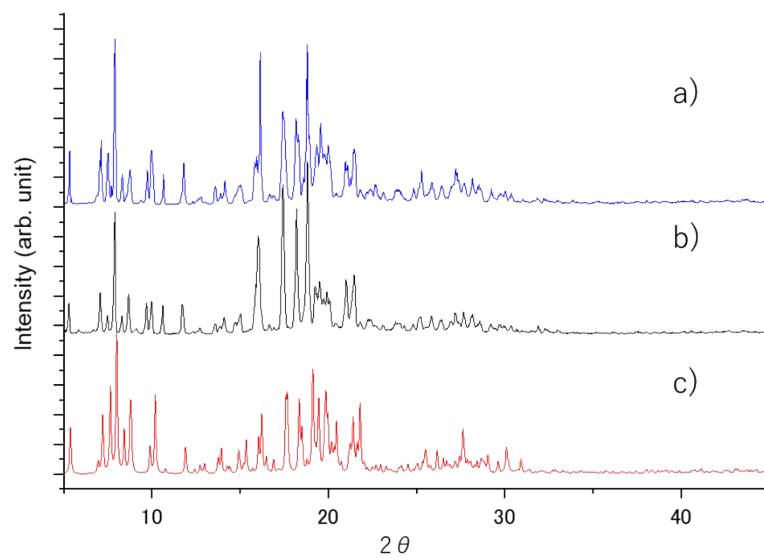

**Figure S3. The experimental XRD pattern of  $C_{70}/3,5$ -TPP nanoribbons a) without annealing, b) after annealing at  $80^\circ\text{C}$  for 1h, and c) simulated XRD pattern from single crystal data**

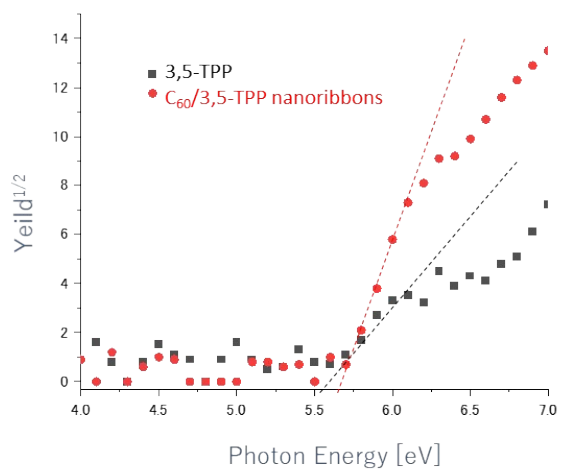

**Figure S4.** PYSA spectra of 3,5-TPP and C<sub>60</sub>/3,5-TPP cocrystals.

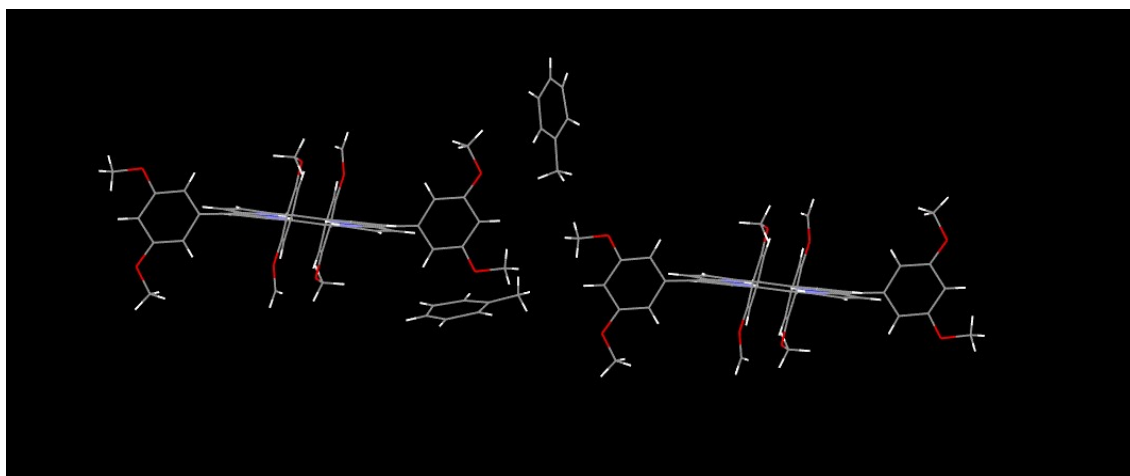

**Figure S5.** The [(3,5-TPP) toluene<sub>2</sub> (3,5-TPP)] unit structure in C<sub>60</sub>/3,5-TPP cocrystals

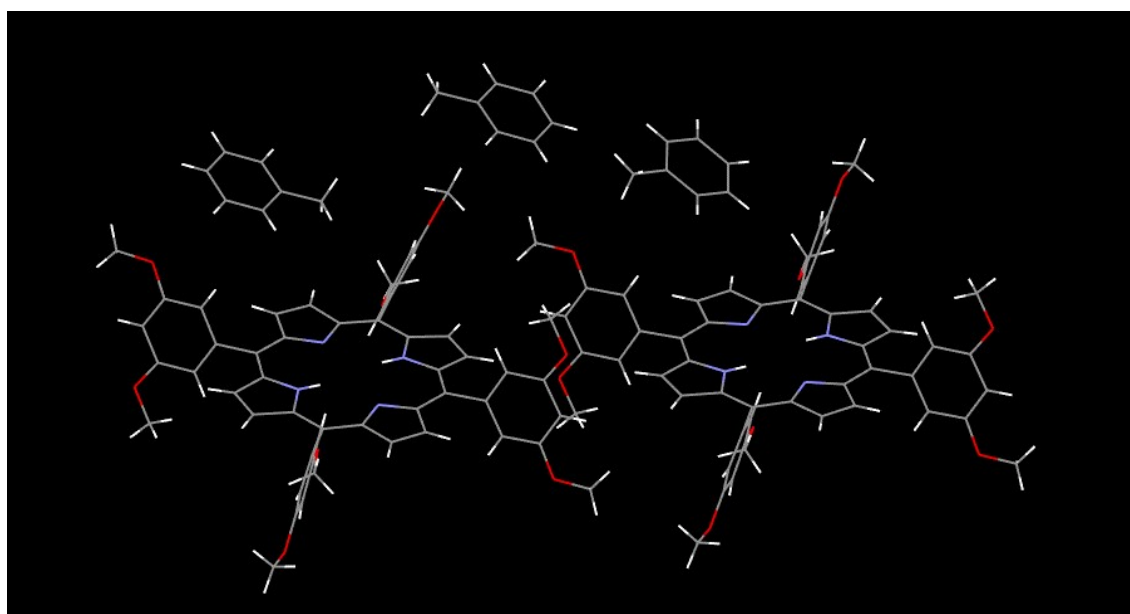

**Figure S6.** The [(3,5-TPP)<sub>2</sub> toluene<sub>3</sub>] unit structure in C<sub>70</sub>/3,5-TPP nanoribbons

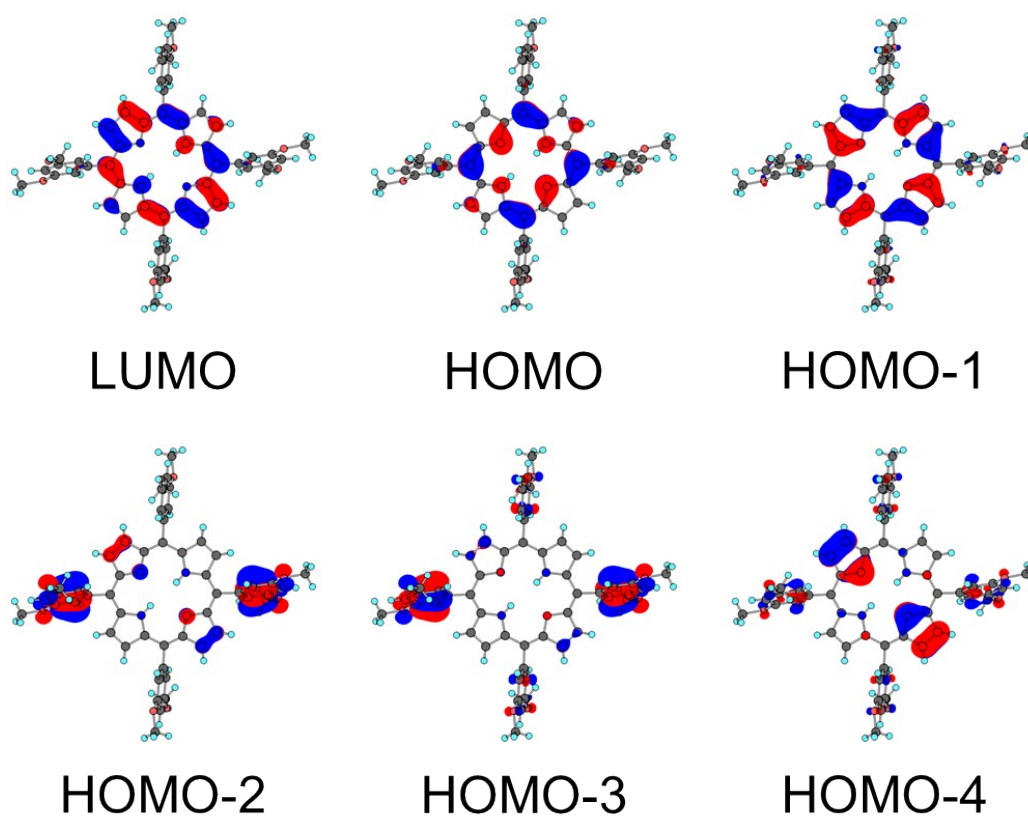

Figure S7. Molecular orbitals of 3,5-TPP.

Table S1. Coupling constant between 3,5-TPPs of C<sub>60</sub>- and C<sub>70</sub>-based cocrystals.

| A      | B      | Coupling constant (eV)            |                                   |
|--------|--------|-----------------------------------|-----------------------------------|
|        |        | TPPs of C <sub>60</sub> cocrystal | TPPs of C <sub>70</sub> cocrystal |
| HOMO   | HOMO   | $1.47 \times 10^{-6}$             | $8.8 \times 10^{-4}$              |
| HOMO-1 | HOMO-1 | $9.2 \times 10^{-5}$              | $3.3 \times 10^{-3}$              |
| HOMO-2 | HOMO-2 | $2.3 \times 10^{-5}$              | $1.5 \times 10^{-2}$              |
| HOMO-3 | HOMO-3 | $4.1 \times 10^{-4}$              | $5.3 \times 10^{-2}$              |
| HOMO-4 | HOMO-4 | $7.7 \times 10^{-5}$              | $1.7 \times 10^{-2}$              |

Here, we explain the calculation technique for coupling constants. The coupling constants were evaluated based on  $\langle \phi_A | H_{AB} | \phi_B \rangle$ . Here,  $\phi_{A(B)}$  is the molecular orbital for each TPP molecule  $A(B)$ , and  $H_{AB}$  is the Fock operator with both TPPs, which is obtained from the DFT calculation. This method assumes that a hole is localized on each TPP site, and hole-hopping occurs between those. To numerically estimate the coupling constants, we need to execute matrix operations between the Fock matrix and the coefficient vectors of molecular orbitals. For such matrix calculations based on quantum chemistry, we employed a Python-based quantum chemistry program tool.<sup>1,2</sup> In the tool, the core part is developed by C++, but the Python interfaces are prepared. Thus, we can easily handle with matrix operations based on quantum chemistry without compromising calculation speeds. The tool has been employed to investigate the ground and excited electronic structures of various materials and molecules.<sup>3-5</sup>

1. T. Shimazaki, M. Hashimoto and T. Maeda, *Proceedings of the 3rd International Workshop on Software Engineering for High Performance Computing in Computational Science and Engineering*, 2015, 9 [DOI: 10.1145/2830168.2830170].
2. T. Shimazaki, in *Recent Advances of the Fragment Molecular Orbital Method*, eds. Y. Mochizuki, S. Tanaka and K. Fukuzawa, Springer, Singapore2021, pp. 589-600.
3. T. Shimazaki and T. Nakajima, *Physical Chemistry Chemical Physics*, 2016, **18**, 27554-27563.
4. T. Shimazaki, K. Kitaura, D. G. Fedorov and T. Nakajima, *J Chem Phys*, 2017, **146**, 084109.
5. T. Shimazaki and M. Tachikawa, *Physical Chemistry Chemical Physics*, 2021, **23**, 21078-21086.

We employed molecular geometries from the corresponding experimental ones. We show those



below in the XYZ-format.

220

TPPs from C60/3,5-TPP

|   |              |              |              |
|---|--------------|--------------|--------------|
| C | 8.909562000  | 9.029039000  | 20.865231000 |
| C | 9.222536000  | 8.570314000  | 22.163545000 |
| H | 8.805132000  | 7.844836000  | 22.611445000 |
| C | 10.238668000 | 9.353502000  | 22.669700000 |
| H | 10.654499000 | 9.264957000  | 23.520246000 |
| C | 10.542577000 | 10.320180000 | 21.670562000 |
| C | 11.507135000 | 11.340562000 | 21.749590000 |
| C | 12.415303000 | 11.353988000 | 22.923718000 |
| C | 13.431073000 | 10.382835000 | 22.998982000 |
| H | 13.468638000 | 9.687476000  | 22.352986000 |
| C | 14.373594000 | 10.434302000 | 24.007528000 |
| C | 14.315775000 | 11.436782000 | 25.006666000 |
| H | 14.915483000 | 11.441705000 | 25.742509000 |
| C | 13.349247000 | 12.401223000 | 24.858018000 |
| C | 12.391580000 | 12.340805000 | 23.896513000 |
| H | 11.694118000 | 12.986712000 | 23.889833000 |
| C | 15.702335000 | 8.720239000  | 23.128814000 |
| H | 15.810540000 | 9.230027000  | 22.299624000 |
| H | 14.987316000 | 8.059363000  | 23.015804000 |
| H | 16.541439000 | 8.259299000  | 23.341022000 |
| C | 14.258107000 | 13.515587000 | 26.797963000 |
| H | 14.175880000 | 12.784895000 | 27.444994000 |
| H | 14.183016000 | 14.374812000 | 27.262685000 |
| H | 15.128934000 | 13.460630000 | 26.351305000 |
| C | 11.702587000 | 12.316191000 | 20.759860000 |
| C | 12.662663000 | 13.392515000 | 20.882165000 |
| H | 13.240849000 | 13.562623000 | 21.617124000 |
| C | 12.568500000 | 14.092909000 | 19.755078000 |
| H | 13.066101000 | 14.871778000 | 19.534835000 |
| C | 11.563308000 | 13.448457000 | 18.919641000 |
| C | 11.214771000 | 13.900468000 | 17.611918000 |
| C | 11.949104000 | 15.137905000 | 17.160330000 |

|   |              |              |              |
|---|--------------|--------------|--------------|
| C | 11.347525000 | 16.388768000 | 17.293925000 |
| H | 10.464822000 | 16.469146000 | 17.638562000 |
| C | 12.054111000 | 17.498658000 | 16.919484000 |
| C | 13.333957000 | 17.420339000 | 16.418974000 |
| H | 13.801200000 | 18.205406000 | 16.158502000 |
| C | 13.913500000 | 16.198566000 | 16.307959000 |
| C | 13.244060000 | 15.028259000 | 16.672992000 |
| H | 13.665091000 | 14.181096000 | 16.589825000 |
| C | 10.424228000 | 18.984477000 | 17.794435000 |
| H | 10.647493000 | 18.815107000 | 18.733398000 |
| H | 9.698533000  | 18.386144000 | 17.518270000 |
| H | 10.139325000 | 19.915173000 | 17.688067000 |
| C | 15.865890000 | 17.051122000 | 15.212859000 |
| H | 16.069324000 | 17.736433000 | 15.883843000 |
| H | 15.292078000 | 17.435264000 | 14.517734000 |
| H | 16.699930000 | 16.732319000 | 14.809083000 |
| O | 13.197427000 | 13.405941000 | 25.804470000 |
| O | 11.475342000 | 18.762947000 | 17.051197000 |
| O | 15.377874000 | 9.575033000  | 24.156176000 |
| O | 15.211691000 | 15.992699000 | 15.818739000 |
| N | 11.042698000 | 12.401223000 | 19.576324000 |
| H | 10.397615000 | 11.872280000 | 19.295098000 |
| N | 9.709237000  | 10.112076000 | 20.607449000 |
| C | 10.294265000 | 13.347761000 | 16.767073000 |
| C | 9.981290000  | 13.806486000 | 15.468758000 |
| H | 10.398695000 | 14.531964000 | 15.020859000 |
| C | 8.965158000  | 13.023298000 | 14.962604000 |
| H | 8.549328000  | 13.111843000 | 14.112057000 |
| C | 8.661250000  | 12.056620000 | 15.961742000 |
| C | 7.696692000  | 11.036238000 | 15.882714000 |
| C | 6.788524000  | 11.022812000 | 14.708586000 |
| C | 5.772753000  | 11.993965000 | 14.633321000 |
| H | 5.735189000  | 12.689324000 | 15.279317000 |
| C | 4.830232000  | 11.942498000 | 13.624775000 |
| C | 4.888052000  | 10.940018000 | 12.625638000 |
| H | 4.288344000  | 10.935095000 | 11.889795000 |

|   |             |              |              |
|---|-------------|--------------|--------------|
| C | 5.854580000 | 9.975577000  | 12.774285000 |
| C | 6.812246000 | 10.035995000 | 13.735791000 |
| H | 7.509708000 | 9.390088000  | 13.742470000 |
| C | 3.501491000 | 13.656561000 | 14.503490000 |
| H | 3.393287000 | 13.146773000 | 15.332680000 |
| H | 4.216510000 | 14.317437000 | 14.616500000 |
| H | 2.662388000 | 14.117501000 | 14.291281000 |
| C | 4.945720000 | 8.861213000  | 10.834340000 |
| H | 5.027947000 | 9.591905000  | 10.187309000 |
| H | 5.020810000 | 8.001988000  | 10.369619000 |
| H | 4.074893000 | 8.916170000  | 11.280998000 |
| C | 7.501239000 | 10.060609000 | 16.872443000 |
| C | 6.541163000 | 8.984285000  | 16.750138000 |
| H | 5.962978000 | 8.814177000  | 16.015179000 |
| C | 6.635327000 | 8.283891000  | 17.877226000 |
| H | 6.137725000 | 7.505022000  | 18.097469000 |
| C | 7.640519000 | 8.928343000  | 18.712663000 |
| C | 7.989055000 | 8.476332000  | 20.020385000 |
| C | 7.254723000 | 7.238895000  | 20.471973000 |
| C | 7.856301000 | 5.988032000  | 20.338378000 |
| H | 8.739005000 | 5.907654000  | 19.993742000 |
| C | 7.149716000 | 4.878142000  | 20.712820000 |
| C | 5.869870000 | 4.956461000  | 21.213329000 |
| H | 5.402627000 | 4.171394000  | 21.473801000 |
| C | 5.290327000 | 6.178234000  | 21.324345000 |
| C | 5.959766000 | 7.348541000  | 20.959311000 |
| H | 5.538735000 | 8.195704000  | 21.042479000 |
| C | 8.779598000 | 3.392323000  | 19.837869000 |
| H | 8.556334000 | 3.561693000  | 18.898905000 |
| H | 9.505293000 | 3.990656000  | 20.114033000 |
| H | 9.064502000 | 2.461627000  | 19.944236000 |
| C | 3.337937000 | 5.325678000  | 22.419445000 |
| H | 3.134503000 | 4.640367000  | 21.748461000 |
| H | 3.911749000 | 4.941536000  | 23.114570000 |
| H | 2.503897000 | 5.644481000  | 22.823221000 |
| O | 6.006400000 | 8.970859000  | 11.827833000 |

|   |              |              |              |
|---|--------------|--------------|--------------|
| O | 7.728485000  | 3.613853000  | 20.581107000 |
| O | 3.825952000  | 12.801767000 | 13.476128000 |
| O | 3.992136000  | 6.384101000  | 21.813565000 |
| N | 8.161129000  | 9.975577000  | 18.055979000 |
| H | 8.806212000  | 10.504520000 | 18.337205000 |
| N | 9.494590000  | 12.264724000 | 17.024854000 |
| C | 18.511475360 | 9.029039000  | 39.681382720 |
| C | 18.824449360 | 8.570314000  | 40.979696720 |
| H | 18.407045360 | 7.844836000  | 41.427596720 |
| C | 19.840581360 | 9.353502000  | 41.485851720 |
| H | 20.256412360 | 9.264957000  | 42.336397720 |
| C | 20.144490360 | 10.320180000 | 40.486713720 |
| C | 21.109048360 | 11.340562000 | 40.565741720 |
| C | 22.017216360 | 11.353988000 | 41.739869720 |
| C | 23.032986360 | 10.382835000 | 41.815133720 |
| H | 23.070551360 | 9.687476000  | 41.169137720 |
| C | 23.975507360 | 10.434302000 | 42.823679720 |
| C | 23.917688360 | 11.436782000 | 43.822817720 |
| H | 24.517396360 | 11.441705000 | 44.558660720 |
| C | 22.951160360 | 12.401223000 | 43.674169720 |
| C | 21.993493360 | 12.340805000 | 42.712664720 |
| H | 21.296031360 | 12.986712000 | 42.705984720 |
| C | 25.304248360 | 8.720239000  | 41.944965720 |
| H | 25.412453360 | 9.230027000  | 41.115775720 |
| H | 24.589229360 | 8.059363000  | 41.831955720 |
| H | 26.143352360 | 8.259299000  | 42.157173720 |
| C | 23.860020360 | 13.515587000 | 45.614114720 |
| H | 23.777793360 | 12.784895000 | 46.261145720 |
| H | 23.784929360 | 14.374812000 | 46.078836720 |
| H | 24.730847360 | 13.460630000 | 45.167456720 |
| C | 21.304500360 | 12.316191000 | 39.576011720 |
| C | 22.264576360 | 13.392515000 | 39.698316720 |
| H | 22.842762360 | 13.562623000 | 40.433275720 |
| C | 22.170413360 | 14.092909000 | 38.571229720 |
| H | 22.668014360 | 14.871778000 | 38.350986720 |
| C | 21.165221360 | 13.448457000 | 37.735792720 |

|   |              |              |              |
|---|--------------|--------------|--------------|
| C | 20.816684360 | 13.900468000 | 36.428069720 |
| C | 21.551017360 | 15.137905000 | 35.976481720 |
| C | 20.949438360 | 16.388768000 | 36.110076720 |
| H | 20.066735360 | 16.469146000 | 36.454713720 |
| C | 21.656024360 | 17.498658000 | 35.735635720 |
| C | 22.935870360 | 17.420339000 | 35.235125720 |
| H | 23.403113360 | 18.205406000 | 34.974653720 |
| C | 23.515413360 | 16.198566000 | 35.124110720 |
| C | 22.845973360 | 15.028259000 | 35.489143720 |
| H | 23.267004360 | 14.181096000 | 35.405976720 |
| C | 20.026141360 | 18.984477000 | 36.610586720 |
| H | 20.249406360 | 18.815107000 | 37.549549720 |
| H | 19.300446360 | 18.386144000 | 36.334421720 |
| H | 19.741238360 | 19.915173000 | 36.504218720 |
| C | 25.467803360 | 17.051122000 | 34.029010720 |
| H | 25.671237360 | 17.736433000 | 34.699994720 |
| H | 24.893991360 | 17.435264000 | 33.333885720 |
| H | 26.301843360 | 16.732319000 | 33.625234720 |
| O | 22.799340360 | 13.405941000 | 44.620621720 |
| O | 21.077255360 | 18.762947000 | 35.867348720 |
| O | 24.979787360 | 9.575033000  | 42.972327720 |
| O | 24.813604360 | 15.992699000 | 34.634890720 |
| N | 20.644611360 | 12.401223000 | 38.392475720 |
| H | 19.999528360 | 11.872280000 | 38.111249720 |
| N | 19.311150360 | 10.112076000 | 39.423600720 |
| C | 19.896178360 | 13.347761000 | 35.583224720 |
| C | 19.583203360 | 13.806486000 | 34.284909720 |
| H | 20.000608360 | 14.531964000 | 33.837010720 |
| C | 18.567071360 | 13.023298000 | 33.778755720 |
| H | 18.151241360 | 13.111843000 | 32.928208720 |
| C | 18.263163360 | 12.056620000 | 34.777893720 |
| C | 17.298605360 | 11.036238000 | 34.698865720 |
| C | 16.390437360 | 11.022812000 | 33.524737720 |
| C | 15.374666360 | 11.993965000 | 33.449472720 |
| H | 15.337102360 | 12.689324000 | 34.095468720 |
| C | 14.432145360 | 11.942498000 | 32.440926720 |

|   |              |              |              |
|---|--------------|--------------|--------------|
| C | 14.489965360 | 10.940018000 | 31.441789720 |
| H | 13.890257360 | 10.935095000 | 30.705946720 |
| C | 15.456493360 | 9.975577000  | 31.590436720 |
| C | 16.414159360 | 10.035995000 | 32.551942720 |
| H | 17.111621360 | 9.390088000  | 32.558621720 |
| C | 13.103404360 | 13.656561000 | 33.319641720 |
| H | 12.995200360 | 13.146773000 | 34.148831720 |
| H | 13.818423360 | 14.317437000 | 33.432651720 |
| H | 12.264301360 | 14.117501000 | 33.107432720 |
| C | 14.547633360 | 8.861213000  | 29.650491720 |
| H | 14.629860360 | 9.591905000  | 29.003460720 |
| H | 14.622723360 | 8.001988000  | 29.185770720 |
| H | 13.676806360 | 8.916170000  | 30.097149720 |
| C | 17.103152360 | 10.060609000 | 35.688594720 |
| C | 16.143076360 | 8.984285000  | 35.566289720 |
| H | 15.564891360 | 8.814177000  | 34.831330720 |
| C | 16.237240360 | 8.283891000  | 36.693377720 |
| H | 15.739638360 | 7.505022000  | 36.913620720 |
| C | 17.242432360 | 8.928343000  | 37.528814720 |
| C | 17.590968360 | 8.476332000  | 38.836536720 |
| C | 16.856636360 | 7.238895000  | 39.288124720 |
| C | 17.458214360 | 5.988032000  | 39.154529720 |
| H | 18.340918360 | 5.907654000  | 38.809893720 |
| C | 16.751629360 | 4.878142000  | 39.528971720 |
| C | 15.471783360 | 4.956461000  | 40.029480720 |
| H | 15.004540360 | 4.171394000  | 40.289952720 |
| C | 14.892240360 | 6.178234000  | 40.140496720 |
| C | 15.561679360 | 7.348541000  | 39.775462720 |
| H | 15.140648360 | 8.195704000  | 39.858630720 |
| C | 18.381511360 | 3.392323000  | 38.654020720 |
| H | 18.158247360 | 3.561693000  | 37.715056720 |
| H | 19.107206360 | 3.990656000  | 38.930184720 |
| H | 18.666415360 | 2.461627000  | 38.760387720 |
| C | 12.939850360 | 5.325678000  | 41.235596720 |
| H | 12.736416360 | 4.640367000  | 40.564612720 |
| H | 13.513662360 | 4.941536000  | 41.930721720 |

|   |              |              |              |
|---|--------------|--------------|--------------|
| H | 12.105810360 | 5.644481000  | 41.639372720 |
| O | 15.608313360 | 8.970859000  | 30.643984720 |
| O | 17.330398360 | 3.613853000  | 39.397258720 |
| O | 13.427865360 | 12.801767000 | 32.292279720 |
| O | 13.594049360 | 6.384101000  | 40.629716720 |
| N | 17.763042360 | 9.975577000  | 36.872130720 |
| H | 18.408125360 | 10.504520000 | 37.153356720 |
| N | 19.096503360 | 12.264724000 | 35.841005720 |

220

TPPs from C70/3,5-TPP

|   |              |              |              |
|---|--------------|--------------|--------------|
| O | 7.036909000  | 5.578862000  | 27.054926000 |
| O | 8.730964000  | 9.940323000  | 26.223271000 |
| O | 17.332155000 | 4.226595000  | 24.945142000 |
| O | 15.420140000 | -0.079525000 | 24.440080000 |
| O | 13.366989000 | 0.628907000  | 13.838282000 |
| O | 14.892249000 | 5.065670000  | 13.065816000 |
| O | 4.694636000  | 5.930698000  | 15.281360000 |
| O | 5.970166000  | 10.383322000 | 16.319126000 |
| N | 11.423852000 | 5.056033000  | 22.051776000 |
| N | 12.756550000 | 4.089217000  | 19.668881000 |
| H | 11.967534000 | 4.476511000  | 19.832928000 |
| N | 9.316905000  | 6.337768000  | 20.506545000 |
| H | 10.075813000 | 5.942146000  | 20.337690000 |
| N | 10.636535000 | 5.354012000  | 18.120344000 |
| C | 8.599522000  | 8.660258000  | 25.777098000 |
| C | 13.029807000 | 2.315469000  | 15.563185000 |
| H | 12.599953000 | 1.703747000  | 16.149370000 |
| C | 6.231854000  | 9.055661000  | 16.471456000 |
| C | 9.545608000  | 5.946145000  | 17.541070000 |
| C | 13.496289000 | 1.894704000  | 14.321411000 |
| C | 9.103875000  | 8.190515000  | 24.568073000 |
| H | 9.577145000  | 8.772135000  | 23.985194000 |
| C | 12.503477000 | 4.442696000  | 22.633755000 |
| C | 13.532070000 | 3.750877000  | 21.977264000 |
| C | 13.638247000 | 3.593229000  | 20.592174000 |

|   |              |              |              |
|---|--------------|--------------|--------------|
| C | 7.715383000  | 6.488314000  | 26.287869000 |
| C | 8.901859000  | 6.846362000  | 24.227359000 |
| C | 8.856073000  | 6.642648000  | 21.758534000 |
| C | 11.397435000 | 4.853730000  | 17.096098000 |
| C | 13.219009000 | 3.782099000  | 18.417492000 |
| C | 14.294858000 | 4.107044000  | 13.839484000 |
| C | 7.288568000  | 7.353927000  | 20.300434000 |
| H | 6.505340000  | 7.726601000  | 19.914051000 |
| C | 10.690289000 | 5.601092000  | 23.073919000 |
| C | 14.456052000 | 3.057581000  | 18.552095000 |
| H | 14.994153000 | 2.725531000  | 17.843927000 |
| C | 14.131293000 | 2.787326000  | 13.449495000 |
| H | 14.444964000 | 2.492029000  | 12.604020000 |
| C | 12.596405000 | 4.130506000  | 17.216880000 |
| C | 5.509889000  | 6.839832000  | 15.890078000 |
| C | 16.412807000 | 3.377829000  | 24.398618000 |
| C | 7.905147000  | 7.809943000  | 26.647211000 |
| H | 7.568348000  | 8.137079000  | 27.473458000 |
| C | 8.208791000  | 5.994422000  | 25.071633000 |
| H | 8.068855000  | 5.086396000  | 24.829468000 |
| C | 9.501511000  | 6.334023000  | 22.957042000 |
| C | 12.446612000 | 4.601797000  | 24.066617000 |
| H | 13.073392000 | 4.269333000  | 24.697268000 |
| C | 13.841170000 | 4.548550000  | 15.089971000 |
| H | 13.968843000 | 5.452215000  | 15.356173000 |
| C | 15.534363000 | 3.942762000  | 23.463907000 |
| H | 15.591882000 | 4.867878000  | 23.252088000 |
| C | 9.519074000  | 10.839208000 | 25.447200000 |
| H | 10.431979000 | 10.489267000 | 25.370284000 |
| H | 9.127150000  | 10.930169000 | 24.553051000 |
| H | 9.541157000  | 11.716310000 | 25.884059000 |
| C | 10.765401000 | 5.143120000  | 15.827284000 |
| H | 11.088232000 | 4.906151000  | 14.965583000 |
| C | 11.325608000 | 5.318388000  | 24.340630000 |
| H | 11.018383000 | 5.582755000  | 25.199026000 |
| C | 12.596459000 | -0.299647000 | 14.598730000 |



|   |              |              |              |
|---|--------------|--------------|--------------|
| H | 11.688431000 | 0.049038000  | 14.716207000 |
| H | 12.559929000 | -1.157485000 | 14.127318000 |
| H | 13.012659000 | -0.428057000 | 15.476354000 |
| C | 3.661880000  | 6.443379000  | 14.444597000 |
| H | 3.078432000  | 7.029575000  | 14.968588000 |
| H | 4.061173000  | 6.953270000  | 13.709688000 |
| H | 3.136784000  | 5.699321000  | 14.082250000 |
| C | 18.200767000 | 3.692890000  | 25.944450000 |
| H | 17.669536000 | 3.378336000  | 26.704297000 |
| H | 18.708953000 | 2.944325000  | 25.568583000 |
| H | 18.819393000 | 4.389485000  | 26.244603000 |
| C | 15.284781000 | 4.696466000  | 11.749230000 |
| H | 15.924832000 | 3.955749000  | 11.795800000 |
| H | 14.496279000 | 4.415247000  | 11.239961000 |
| H | 15.704319000 | 5.463850000  | 11.306061000 |
| C | 14.596674000 | -0.985227000 | 23.712983000 |
| H | 13.654184000 | -0.759781000 | 23.859003000 |
| H | 14.803699000 | -0.920315000 | 22.756340000 |
| H | 14.764236000 | -1.900905000 | 24.021248000 |
| C | 14.581143000 | 3.141814000  | 22.852184000 |
| C | 8.390129000  | 6.760046000  | 19.590162000 |
| C | 7.242063000  | 8.538698000  | 17.273366000 |
| H | 7.825209000  | 9.117872000  | 17.747782000 |
| C | 13.203229000 | 3.653470000  | 15.936048000 |
| C | 7.386138000  | 7.147186000  | 17.368910000 |
| C | 7.576183000  | 7.285627000  | 21.634146000 |
| H | 7.031978000  | 7.603107000  | 22.344718000 |
| C | 5.368611000  | 8.212595000  | 15.760883000 |
| H | 4.695436000  | 8.577301000  | 15.196932000 |
| C | 8.490370000  | 6.590065000  | 18.204471000 |
| C | 9.621335000  | 5.819072000  | 16.105503000 |
| H | 8.990790000  | 6.147503000  | 15.476354000 |
| C | 6.522503000  | 6.297994000  | 16.690787000 |
| H | 6.618000000  | 5.356605000  | 16.768304000 |
| C | 14.709873000 | 2.939118000  | 19.890615000 |
| H | 15.456533000 | 2.504990000  | 20.283608000 |

|   |              |              |              |
|---|--------------|--------------|--------------|
| C | 16.327173000 | 2.034481000  | 24.722206000 |
| H | 16.899237000 | 1.662534000  | 25.382302000 |
| C | 14.518148000 | 1.767220000  | 23.125296000 |
| H | 13.890661000 | 1.212437000  | 22.675217000 |
| C | 15.389922000 | 1.231926000  | 24.065715000 |
| C | 6.821054000  | 11.307101000 | 16.976518000 |
| H | 6.776379000  | 11.160469000 | 17.946081000 |
| H | 7.742028000  | 11.178345000 | 16.669154000 |
| H | 6.533409000  | 12.221760000 | 16.771308000 |
| C | 6.622698000  | 5.998741000  | 28.351082000 |
| H | 7.406715000  | 6.272940000  | 28.870566000 |
| H | 6.005154000  | 6.755312000  | 28.266655000 |
| H | 6.171318000  | 5.257641000  | 28.804466000 |
| O | -0.870124850 | 13.523736030 | 36.958170730 |
| O | 0.687456150  | 17.912600030 | 36.025262730 |
| O | -3.076564850 | 13.766035030 | 24.913895730 |
| O | -1.455304850 | 18.149646030 | 25.653911730 |
| N | 1.364177150  | 14.177812030 | 30.358110730 |
| H | 2.144755150  | 13.788424030 | 30.222605730 |
| N | 2.719192150  | 13.074677030 | 28.075866730 |
| C | 0.557756150  | 16.625307030 | 35.589304730 |
| C | 1.042847150  | 16.155638030 | 34.373970730 |
| H | 1.480925150  | 16.742737030 | 33.767955730 |
| C | -0.099135850 | 15.774691030 | 36.484655730 |
| H | -0.430283850 | 16.106145030 | 37.310301730 |
| C | 1.639694150  | 13.628377030 | 27.435299730 |
| C | -0.258570850 | 14.441937030 | 36.148147730 |
| C | 0.475080150  | 14.594870030 | 29.405673730 |
| C | 0.884755150  | 14.536151030 | 31.588166730 |
| C | 0.594059150  | 14.352379030 | 28.031098730 |
| C | -0.375814850 | 15.209262030 | 31.410598730 |
| H | -0.931485850 | 15.558604030 | 32.097435730 |
| C | 3.488206150  | 12.484655030 | 27.106303730 |
| C | 1.503861150  | 14.265161030 | 32.810110730 |
| C | 0.219873150  | 13.942449030 | 34.929809730 |
| H | 0.098912150  | 13.027379030 | 34.702366730 |

|   |              |              |              |
|---|--------------|--------------|--------------|
| C | -0.622193850 | 15.250133030 | 30.065468730 |
| H | -1.378690850 | 15.640718030 | 29.645735730 |
| C | -2.226835850 | 14.645559030 | 25.522012730 |
| C | -1.344960850 | 16.830492030 | 25.968486730 |
| C | 1.725933150  | 13.370826030 | 26.016859730 |
| H | 1.103202150  | 13.641218030 | 25.352256730 |
| C | -1.333473850 | 14.091838030 | 26.451615730 |
| H | -1.335998850 | 13.156556030 | 26.623174730 |
| C | 1.495979150  | 18.799260030 | 35.257002730 |
| H | 2.396877150  | 18.423448030 | 35.165064730 |
| H | 1.548422150  | 19.667678030 | 35.708884730 |
| H | 1.099686150  | 18.916138030 | 34.368862730 |
| C | -1.325044850 | 13.975007030 | 38.227585730 |
| H | -1.973653850 | 14.699401030 | 38.103498730 |
| H | -0.563964850 | 14.303952030 | 38.749473730 |
| H | -1.752098850 | 13.232202030 | 38.704405730 |
| C | -4.066555850 | 14.318356030 | 24.049490730 |
| H | -3.629505850 | 14.762982030 | 23.294150730 |
| H | -4.605888850 | 14.969638030 | 24.544036730 |
| H | -4.646292850 | 13.600643030 | 23.714785730 |
| C | -0.658603850 | 19.068624030 | 26.392426730 |
| H | 0.289970150  | 18.891509030 | 26.220566730 |
| H | -0.842612850 | 18.964892030 | 27.350271730 |
| H | -0.874019850 | 19.983484030 | 26.115408730 |
| C | 0.872697150  | 14.800361030 | 34.058494730 |
| C | -0.444538850 | 14.923099030 | 27.119823730 |
| C | -2.220880850 | 16.004287030 | 25.260317730 |
| H | -2.804938850 | 16.369758030 | 24.607132730 |
| C | -0.457668850 | 16.307943030 | 26.899891730 |
| H | 0.130138150  | 16.879731030 | 27.380316730 |
| C | 2.868520150  | 12.666731030 | 25.814654730 |
| H | 3.197794150  | 12.353616030 | 24.979694730 |
| O | 7.062825150  | 12.523541030 | 23.132506730 |
| O | 5.505244150  | 8.134677030  | 24.065414730 |
| O | 9.269265150  | 12.281242030 | 35.176781730 |
| O | 7.648005150  | 7.897631030  | 34.436765730 |

|   |              |              |              |
|---|--------------|--------------|--------------|
| N | 4.828523150  | 11.869465030 | 29.732566730 |
| H | 4.047945150  | 12.258853030 | 29.868071730 |
| N | 3.473508150  | 12.972600030 | 32.014810730 |
| C | 5.634944150  | 9.421970030  | 24.501372730 |
| C | 5.149853150  | 9.891639030  | 25.716706730 |
| H | 4.711774150  | 9.304540030  | 26.322721730 |
| C | 6.291836150  | 10.272586030 | 23.606021730 |
| H | 6.622984150  | 9.941132030  | 22.780375730 |
| C | 4.553006150  | 12.418900030 | 32.655377730 |
| C | 6.451271150  | 11.605340030 | 23.942529730 |
| C | 5.717620150  | 11.452407030 | 30.685003730 |
| C | 5.307944150  | 11.511126030 | 28.502510730 |
| C | 5.598641150  | 11.694898030 | 32.059578730 |
| C | 6.568515150  | 10.838015030 | 28.680078730 |
| H | 7.124185150  | 10.488673030 | 27.993241730 |
| C | 2.704494150  | 13.562622030 | 32.984373730 |
| C | 4.688839150  | 11.782116030 | 27.280566730 |
| C | 5.972827150  | 12.104828030 | 25.160867730 |
| H | 6.093788150  | 13.019898030 | 25.388310730 |
| C | 6.814894150  | 10.797144030 | 30.025208730 |
| H | 7.571391150  | 10.406559030 | 30.444941730 |
| C | 8.419536150  | 11.401718030 | 34.568664730 |
| C | 7.537661150  | 9.216785030  | 34.122190730 |
| C | 4.466767150  | 12.676451030 | 34.073817730 |
| H | 5.089497150  | 12.406059030 | 34.738420730 |
| C | 7.526174150  | 11.955439030 | 33.639061730 |
| H | 7.528699150  | 12.890721030 | 33.467502730 |
| C | 4.696721150  | 7.248017030  | 24.833674730 |
| H | 3.795822150  | 7.623829030  | 24.925612730 |
| H | 4.644278150  | 6.379599030  | 24.381792730 |
| H | 5.093014150  | 7.131139030  | 25.721814730 |
| C | 7.517745150  | 12.072270030 | 21.863091730 |
| H | 8.166354150  | 11.347876030 | 21.987178730 |
| H | 6.756665150  | 11.743325030 | 21.341203730 |
| H | 7.944799150  | 12.815075030 | 21.386271730 |
| C | 10.259256150 | 11.728921030 | 36.041186730 |

|   |              |              |              |
|---|--------------|--------------|--------------|
| H | 9.822206150  | 11.284295030 | 36.796526730 |
| H | 10.798589150 | 11.077639030 | 35.546640730 |
| H | 10.838993150 | 12.446634030 | 36.375891730 |
| C | 6.851304150  | 6.978653030  | 33.698250730 |
| H | 5.902729150  | 7.155768030  | 33.870110730 |
| H | 7.035313150  | 7.082385030  | 32.740405730 |
| H | 7.066720150  | 6.063793030  | 33.975268730 |
| C | 5.320003150  | 11.246916030 | 26.032182730 |
| C | 6.637239150  | 11.124178030 | 32.970853730 |
| C | 8.413581150  | 10.042990030 | 34.830359730 |
| H | 8.997639150  | 9.677519030  | 35.483544730 |
| C | 6.650369150  | 9.739334030  | 33.190785730 |
| H | 6.062561150  | 9.167546030  | 32.710360730 |
| C | 3.324180150  | 13.380546030 | 34.276022730 |
| H | 2.994906150  | 13.693661030 | 35.110982730 |
